# Supplementary material for: Cross-sectional geometry predicts failure location in maize stalks
Source: Plant Methods. 2022 Apr 27;18:56. doi: 10.1186/s13007-022-00887-x (PMC9044803; doi:10.1186/s13007-022-00887-x)
Supplement: Supplementary file 1 — Additional file 1. Internodal stress calculator. [file 13007_2022_887_MOESM1_ESM.xlsx]

## Sheet: Sheet1
	Internode #	USER INPUTS				OUTPUTS
		Distance from Canopy (mm)	Minor Diameter (mm)	Major Diameter (mm)	Rind Thickness (mm)	Section Modulus (mm^4)	Stress (N/mm^2)	Stress (Max-Normalized)
	1	13.7	14.0149	15.33	1.5747	294.685	0.0464903	0.29834
	2	34.3	14.7712	16.81	1.7016	359.067	0.0955253	0.613009
	3	60.21	14.94	17.68	1.83	386.382	0.15583	1
	4	73.2	16.726	19.67	2.3366	539.181	0.135761	0.871213
	5	83.2	17.4	20.23	2.56	600.257	0.138607	0.889476
	6
	7
	8
	9
	10
						Standard Deviation		0.0439509
